# Supplementary material
Source: publisher site journal article supplement (https://www.dovepress.com/article/477435)
Supplement: Supplementary file 1 [file get_supplementary_file.php]

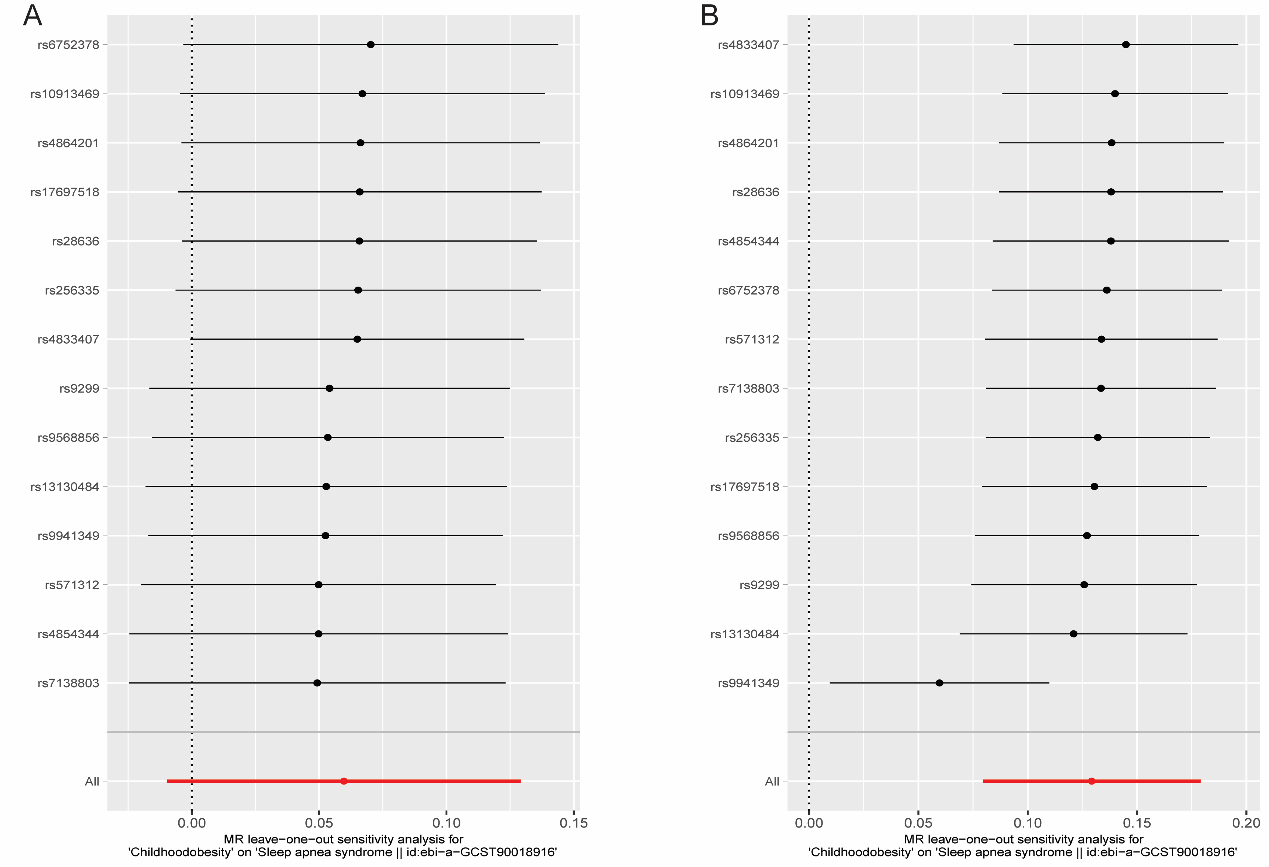


**Supplementary Figure 1 Sensitivity analyses of the causal relationship between genetic susceptibility to childhood obesity and increased risk of sleep apnea syndrome based on weighted median (A) and maximum likelihood (B).**

MR, Mendelian randomization.

**Supplementary Table 1 Datasets information of childhood obesity and sleep apnea syndrome**

| **Exposure or outcome** | **GWAS ID** | **Cases** | **Controls** | **Sample size** | **Participants** | **Number of SNPs** | **Year** | **PMID** |
| --- | --- | --- | --- | --- | --- | --- | --- | --- |
| Childhood obesity | ieu-a-1096 | 5530 | 8318 | 13848 | European | 2442739 | 2012 | 22484627 |
| Sleep apnea syndrome | ebi-a-GCST90018916 | 13818 | 463035 | 476853 | European | 24183940 | 2021 | 34594039 |

MR, Mendelian randomization; SNPs, single nucleotide polymorphisms.

**Supplementary Table 2 MR analysis of the causal relationship between childhood obesity and the risk of sleep apnea syndrome**

| **Outcome** | **Exposure** | **Method** | **NSNP** | **B** | **SE** | **P value** |
| --- | --- | --- | --- | --- | --- | --- |
| Sleep apnea syndrome || id:ebi-a-GCST90018916 | Childhood obesity | MR-Egger | 14 | 0.410279965 | 0.240405073 | 0.113613814 |
| Sleep apnea syndrome || id:ebi-a-GCST90018916 | Childhood obesity | Weighted median | 14 | 0.05974553 | 0.03462256 | 0.084415029 |
| Sleep apnea syndrome || id:ebi-a-GCST90018916 | Childhood obesity | Inverse variance weighted | 14 | 0.115830477 | 0.048308065 | 0.016496293 |
| Sleep apnea syndrome || id:ebi-a-GCST90018916 | Childhood obesity | Simple mode | 14 | 0.04632996 | 0.051691232 | 0.386398151 |
| Sleep apnea syndrome || id:ebi-a-GCST90018916 | Childhood obesity | Weighted mode | 14 | 0.054188739 | 0.048277742 | 0.281979972 |

MR, Mendelian randomization; NSNP, number of single nucleotide polymorphisms; B, beta; SE, standard error.

**Supplementary Table 3 MR analysis of the causal relationship between sleep apnea syndrome and the risk of childhood obesity**

| **Outcome** | **Exposure** | **Method** | **NSNP** | **B** | **SE** | **P value** |
| --- | --- | --- | --- | --- | --- | --- |
| Childhood obesity || id:ieu-a-1096 | Sleep apnea syndrome | MR-Egger | 13 | 1.438113884 | 1.154470377 | 0.238757753 |
| Childhood obesity || id:ieu-a-1096 | Sleep apnea syndrome | Weighted median | 13 | 0.002799033 | 0.16971092 | 0.98684113 |
| Childhood obesity || id:ieu-a-1096 | Sleep apnea syndrome | Inverse variance weighted | 13 | 0.406926035 | 0.234924529 | 0.083245713 |
| Childhood obesity || id:ieu-a-1096 | Sleep apnea syndrome | Simple mode | 13 | -0.036773387 | 0.217051025 | 0.868286619 |
| Childhood obesity || id:ieu-a-1096 | Sleep apnea syndrome | Weighted mode | 13 | -0.050520193 | 0.202339572 | 0.807057491 |

MR, Mendelian randomization; NSNP, number of single nucleotide polymorphisms; B, beta; SE, standard error.

**Supplementary Table 4 Heterogeneity test**

| **Outcome** | **Exposure** | **Method** | **Q** | **Q_df** | **Q_p** **value** |
| --- | --- | --- | --- | --- | --- |
| Childhood obesity || id:ieu-a-1096 | Sleep apnea syndrome | MR-Egger | 51.26451 | 11 | 3.70E-07 |
| Childhood obesity || id:ieu-a-1096 | Sleep apnea syndrome | Inverse variance weighted | 55.14571 | 12 | 1.70E-07 |

Q, Cochran’s Q test value; Q_df, degree of freedom of Q statistic; Q_P value, P value of Q statistic.

**Supplementary Table 5 MR-PRESSO test of causal relationship between sleep respiratory syndrome and the risk of childhood obesity**

| **Main MR results** | **P value** |
| --- | --- |
| Causal estimate of raw | 0.1088449 |
| Causal estimate of outlier-corrected | 0.5537431 |

MR, Mendelian randomization.
